# Supplementary material
Source: ML conference proceedings conference paper supplement (https://openreview.net/forum?id=4qj7qO1fTJ)

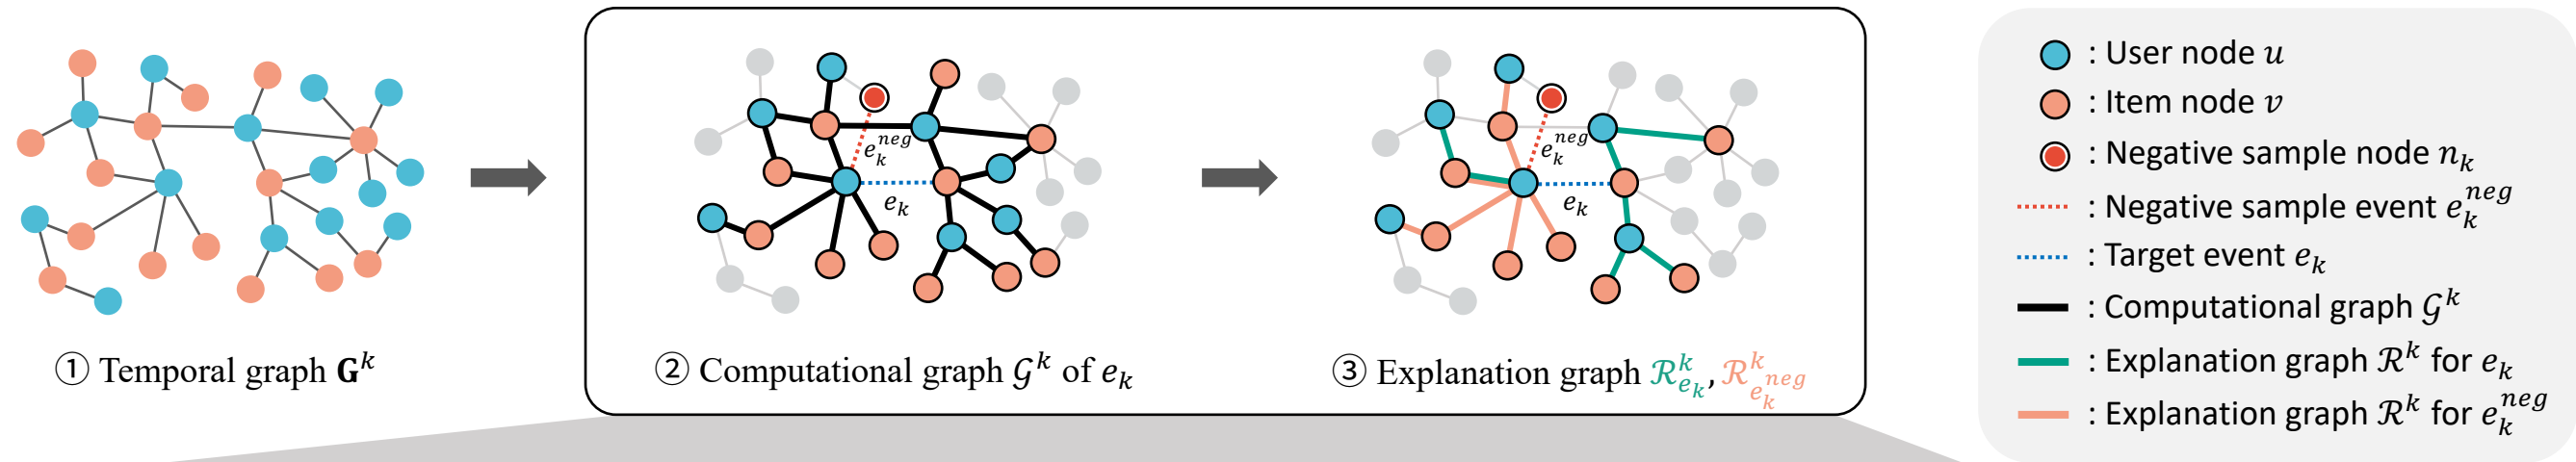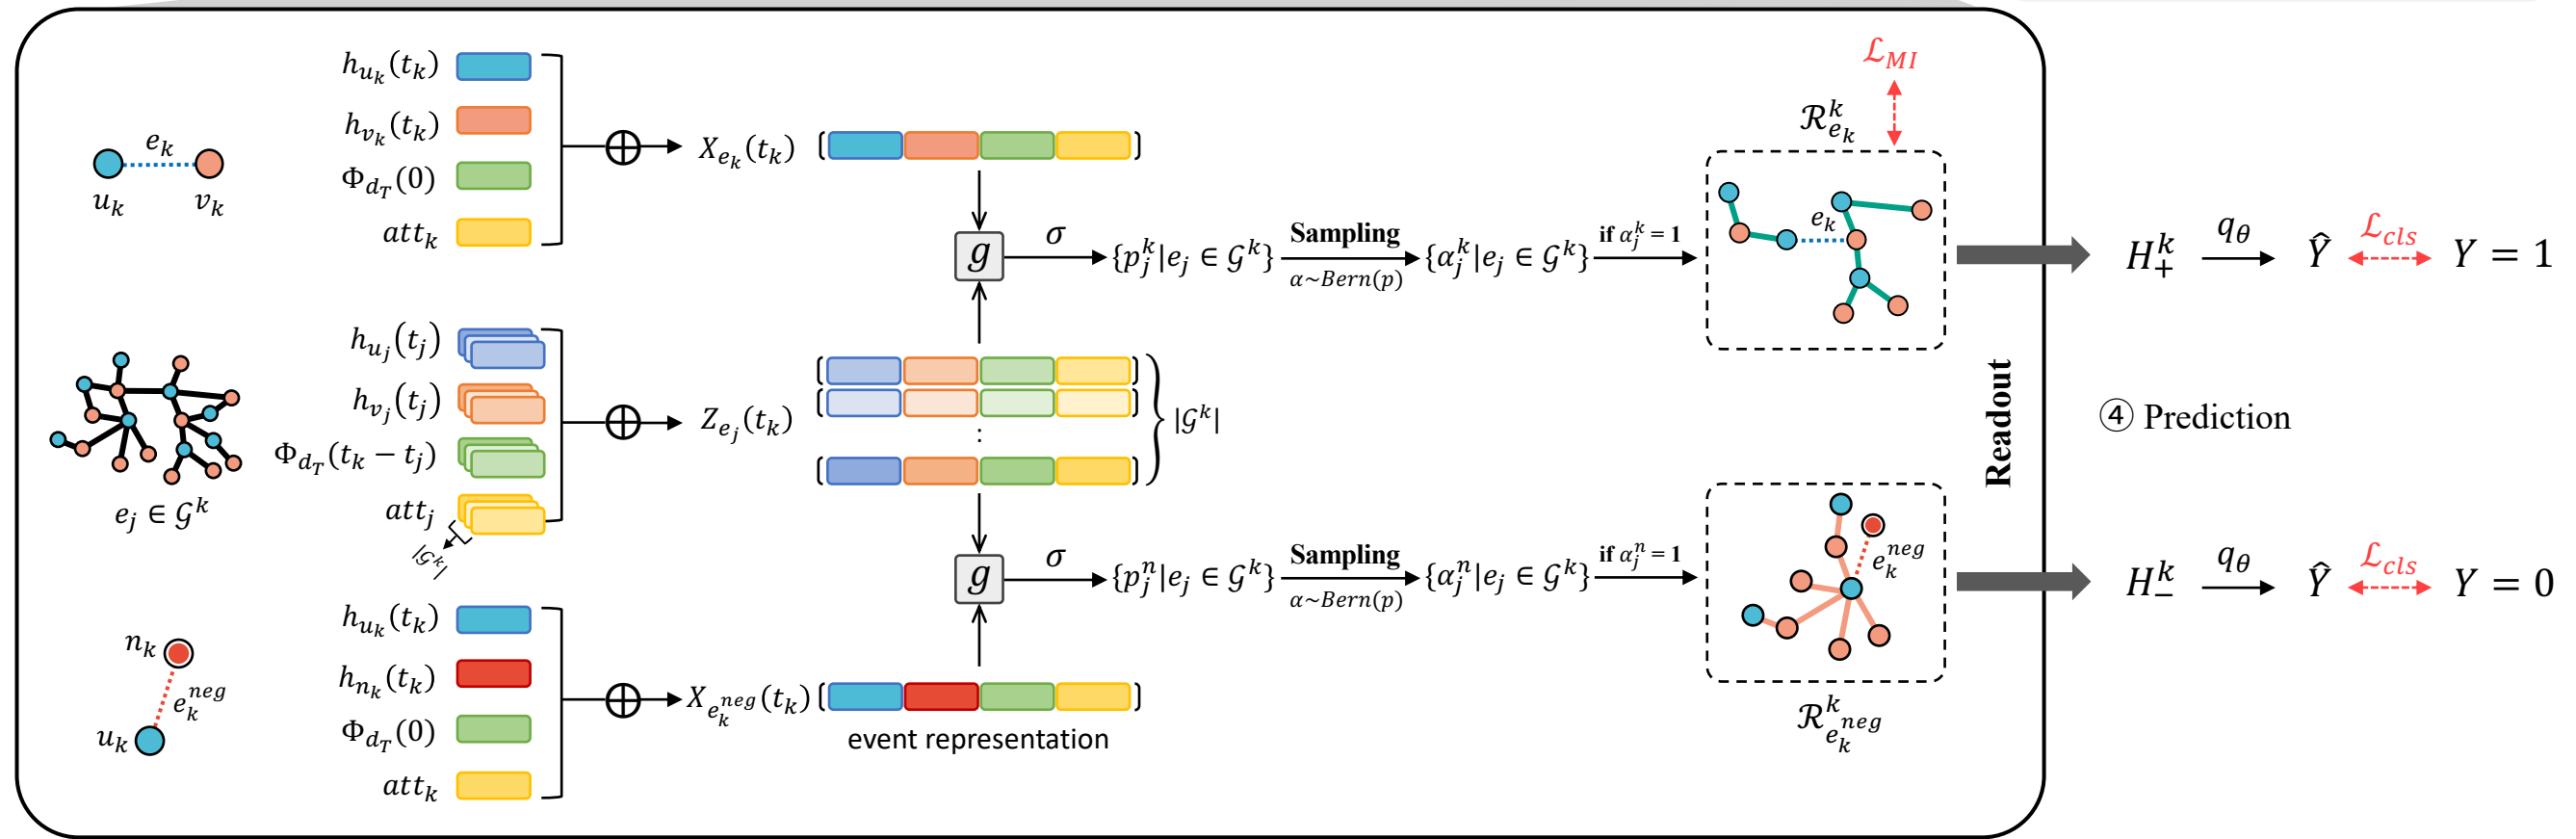

Supplement: supplementary_material [file architecture.pdf › BottleneckMLP-main/TGIB-BottleneckMLP/architecture.pdf]
